# Supplementary material for: Greater proportion of patients report an acceptable symptom state after ACL reconstruction compared with non-surgical treatment: a 10-year follow-up from the Swedish National Knee Ligament Registry
Source: PubMed Central journal article supplement — Br J Sports Med. 2022 Apr 8;56(15):862–9. doi: 10.1136/bjsports-2021-105115 (PMC9304118; doi:10.1136/bjsports-2021-105115), 2022-04-08
Supplement: bjsports-2021-105115supp001.pdf [file bjsports-2021-105115supp001.pdf]

**Appendix Table 1. Proportion of patients exceeding the patient acceptable symptom state cut-offs for the Knee injury and Osteoarthritis Outcome Score subscales by follow-up.**

| Follow-up               | Variable                                       | Non-surgical treatment (n=982) | ACL Reconstruction (n=8838) | p-value | Difference between groups Mean (95% CI) |
|-------------------------|------------------------------------------------|--------------------------------|-----------------------------|---------|-----------------------------------------|
| <b>Baseline</b>         |                                                | n=489                          | n=5977                      |         |                                         |
|                         | <b>KOOS Symptoms <math>\geq</math> 57.1</b>    |                                |                             |         |                                         |
|                         | No                                             | 162 (33.2%)                    | 1392 (23.3%)                |         | 9.9 (5.5; 14.3)                         |
|                         | Yes                                            | 326 (66.8%)                    | 4585 (76.7%)                | <.0001  | -9.9 (-14.3; -5.5)                      |
|                         | <b>KOOS Pain <math>\geq</math> 88.9</b>        |                                |                             |         |                                         |
|                         | No                                             | 428 (87.5%)                    | 4783 (80.0%)                |         | 7.5 (4.3; 10.7)                         |
|                         | Yes                                            | 61 (12.5%)                     | 1194 (20.0%)                | <.0001  | -7.5 (-10.7; -4.3)                      |
|                         | <b>KOOS ADL = 100</b>                          |                                |                             |         |                                         |
|                         | No                                             | 441 (90.2%)                    | 5176 (86.6%)                |         | 3.6 (0.7; 6.5)                          |
|                         | Yes                                            | 48 (9.8%)                      | 800 (13.4%)                 | 0.025   | -3.6 (-6.5; -0.7)                       |
|                         | <b>KOOS Sport&amp;Rec <math>\geq</math> 75</b> |                                |                             |         |                                         |
|                         | No                                             | 431 (88.1%)                    | 5111 (85.6%)                |         | 2.6 (-0.6; 5.7)                         |
|                         | Yes                                            | 58 (11.9%)                     | 861 (14.4%)                 | 0.13    | -2.6 (-5.7; 0.6)                        |
|                         | <b>KOOS QoL <math>\geq</math> 62.5</b>         |                                |                             |         |                                         |
|                         | No                                             | 457 (93.5%)                    | 5478 (91.7%)                |         | 1.7 (-0.7; 4.2)                         |
|                         | Yes                                            | 32 (6.5%)                      | 495 (8.3%)                  | 0.20    | -1.7 (-4.2; 0.7)                        |
| <b>1 year follow-up</b> |                                                | n=740                          | n=4018                      |         |                                         |
|                         | <b>KOOS Symptoms <math>\geq</math> 57.1</b>    |                                |                             |         |                                         |
|                         | No                                             | 107 (14.5%)                    | 490 (12.2%)                 |         | 2.3 (-0.5; 5.1)                         |
|                         | Yes                                            | 633 (85.5%)                    | 3528 (87.8%)                | 0.10    | -2.3 (-5.1; 0.5)                        |
|                         | <b>KOOS Pain <math>\geq</math> 88.9</b>        |                                |                             |         |                                         |
|                         | No                                             | 499 (67.4%)                    | 2186 (54.4%)                |         | 13.0 (9.2; 16.8)                        |
|                         | Yes                                            | 241 (32.6%)                    | 1832 (45.6%)                | <.0001  | -13.0 (-16.8; -9.2)                     |
|                         | <b>KOOS ADL = 100</b>                          |                                |                             |         |                                         |
|                         | No                                             | 572 (77.3%)                    | 2703 (67.3%)                |         | 10.0 (6.6; 13.4)                        |
|                         | Yes                                            | 168 (22.7%)                    | 1314 (32.7%)                | <.0001  | -10.0 (-13.4; -6.6)                     |
|                         | <b>KOOS Sport&amp;Rec <math>\geq</math> 75</b> |                                |                             |         |                                         |
|                         | No                                             | 496 (67.0%)                    | 2161 (53.8%)                |         | 13.2 (9.4; 17.0)                        |
|                         | Yes                                            | 244 (33.0%)                    | 1855 (46.2%)                | <.0001  | -13.2 (-17.0; -9.4)                     |
|                         | <b>KOOS QoL <math>\geq</math> 62.5</b>         |                                |                             |         |                                         |
|                         | No                                             | 525 (70.9%)                    | 1831 (45.6%)                |         | 25.4 (21.7; 29.1)                       |
|                         | Yes                                            | 215 (29.1%)                    | 2188 (54.4%)                | <.0001  | -25.4 (-29.1; -21.7)                    |
| <b>2 year follow-up</b> |                                                | n=614                          | n=3396                      |         |                                         |
|                         | <b>KOOS Symptoms <math>\geq</math> 57.1</b>    |                                |                             |         |                                         |
|                         | No                                             | 77 (12.5%)                     | 369 (10.9%)                 |         | 1.7 (-1.2; 4.6)                         |
|                         | Yes                                            | 537 (87.5%)                    | 3027 (89.1%)                | 0.25    | -1.7 (-4.6; 1.2)                        |
|                         | <b>KOOS Pain <math>\geq</math> 88.9</b>        |                                |                             |         |                                         |
|                         | No                                             | 361 (58.9%)                    | 1662 (48.9%)                |         | 10.0 (5.6; 14.3)                        |
|                         | Yes                                            | 252 (41.1%)                    | 1735 (51.1%)                | <.0001  | -10.0 (-14.3; -5.6)                     |
|                         | <b>KOOS ADL = 100</b>                          |                                |                             |         |                                         |
|                         | No                                             | 422 (68.7%)                    | 2154 (63.4%)                |         | 5.3 (1.2; 9.4)                          |
|                         | Yes                                            | 192 (31.3%)                    | 1242 (36.6%)                | 0.013   | -5.3 (-9.4; -1.2)                       |
|                         | <b>KOOS Sport&amp;Rec <math>\geq</math> 75</b> |                                |                             |         |                                         |
|                         | No                                             | 363 (59.1%)                    | 1678 (49.4%)                |         | 9.7 (5.4; 14.0)                         |
|                         | Yes                                            | 251 (40.9%)                    | 1717 (50.6%)                | <.0001  | -9.7 (-14.0; -5.4)                      |
|                         | <b>KOOS QoL <math>\geq</math> 62.5</b>         |                                |                             |         |                                         |
|                         | No                                             | 350 (57.0%)                    | 1363 (40.1%)                |         | 16.9 (12.5; 21.2)                       |
|                         | Yes                                            | 264 (43.0%)                    | 2032 (59.9%)                | <.0001  | -16.9 (-21.2; -12.5)                    |

| Follow-up                | Variable                                       | Non-surgical treatment (n=982) | ACL Reconstruction (n=8838) | p-value | Difference between groups Mean (95% CI) |
|--------------------------|------------------------------------------------|--------------------------------|-----------------------------|---------|-----------------------------------------|
| <b>5 year follow-up</b>  |                                                | n=329                          | n=2202                      |         |                                         |
|                          | <b>KOOS Symptoms <math>\geq</math> 57.1</b>    |                                |                             |         |                                         |
|                          | No                                             | 35 (10.6%)                     | 194 (8.8%)                  |         | 1.8 (-1.9; 5.5)                         |
|                          | Yes                                            | 294 (89.4%)                    | 2008 (91.2%)                | 0.33    | -1.8 (-5.5; 1.9)                        |
|                          | <b>KOOS Pain <math>\geq</math> 88.9</b>        |                                |                             |         |                                         |
|                          | No                                             | 163 (49.5%)                    | 948 (43.1%)                 |         | 6.5 (0.5; 12.5)                         |
|                          | Yes                                            | 166 (50.5%)                    | 1254 (56.9%)                | 0.032   | -6.5 (-12.5; -0.5)                      |
|                          | <b>KOOS ADL = 100</b>                          |                                |                             |         |                                         |
|                          | No                                             | 213 (64.7%)                    | 1252 (56.9%)                |         | 7.9 (2.1; 13.6)                         |
|                          | Yes                                            | 116 (35.3%)                    | 950 (43.1%)                 | 0.0078  | -7.9 (-13.6; -2.1)                      |
|                          | <b>KOOS Sport&amp;Rec <math>\geq</math> 75</b> |                                |                             |         |                                         |
|                          | No                                             | 176 (53.5%)                    | 973 (44.2%)                 |         | 9.3 (3.4; 15.3)                         |
|                          | Yes                                            | 153 (46.5%)                    | 1229 (55.8%)                | 0.0020  | -9.3 (-15.3; -3.4)                      |
|                          | <b>KOOS QoL <math>\geq</math> 62.5</b>         |                                |                             |         |                                         |
|                          | No                                             | 148 (45.0%)                    | 748 (34.0%)                 |         | 11.0 (5.1; 16.9)                        |
|                          | Yes                                            | 181 (55.0%)                    | 1455 (66.0%)                | 0.0001  | -11.0 (-16.9; -5.1)                     |
| <b>10 year follow-up</b> |                                                | n=97                           | n=585                       |         |                                         |
|                          | <b>KOOS Symptoms <math>\geq</math> 57.1</b>    |                                |                             |         |                                         |
|                          | No                                             | 14 (14.6%)                     | 58 (9.9%)                   |         | 4.7 (-3.4; 12.7)                        |
|                          | Yes                                            | 82 (85.4%)                     | 527 (90.1%)                 | 0.23    | -4.7 (-12.7; 3.4)                       |
|                          | <b>KOOS Pain <math>\geq</math> 88.9</b>        |                                |                             |         |                                         |
|                          | No                                             | 57 (59.4%)                     | 236 (40.3%)                 |         | 19.0 (7.8; 30.2)                        |
|                          | Yes                                            | 39 (40.6%)                     | 349 (59.7%)                 | 0.0008  | -19.0 (-30.2; -7.8)                     |
|                          | <b>KOOS ADL = 100</b>                          |                                |                             |         |                                         |
|                          | No                                             | 64 (66.7%)                     | 322 (55.1%)                 |         | 11.5 (0.7; 22.4)                        |
|                          | Yes                                            | 32 (33.3%)                     | 262 (44.9%)                 | 0.044   | -11.5 (-22.4; -0.7)                     |
|                          | <b>KOOS Sport&amp;Rec <math>\geq</math> 75</b> |                                |                             |         |                                         |
|                          | No                                             | 59 (61.5%)                     | 253 (43.2%)                 |         | 18.2 (7.1; 29.3)                        |
|                          | Yes                                            | 37 (38.5%)                     | 332 (56.8%)                 | 0.0013  | -18.2 (-29.3; -7.1)                     |
|                          | <b>KOOS QoL <math>\geq</math> 62.5</b>         |                                |                             |         |                                         |
|                          | No                                             | 54 (56.3%)                     | 184 (31.5%)                 |         | 24.8 (13.6; 36.0)                       |
|                          | Yes                                            | 42 (43.8%)                     | 401 (68.5%)                 | <.0001  | -24.8 (-36.0; -13.6)                    |

ACL, anterior cruciate ligament; ADL, activities of daily living; CI, confidence interval; KOOS, Knee injury and Osteoarthritis Outcome Score; Sport&Rec, function in sport and recreation; QoL, Quality of Life.

For categorical variables n (%) is presented.

For comparison between groups Fisher's Exact test (lowest 1-sided p-value multiplied by 2) was used for dichotomous variables. The confidence interval for dichotomous variables is the unconditional exact confidence limits. If no exact limits can be computed the asymptotic Wald confidence limits with continuity correction are calculated instead.
