# Supplementary material for: Greater proportion of patients report an acceptable symptom state after ACL reconstruction compared with non-surgical treatment: a 10-year follow-up from the Swedish National Knee Ligament Registry
Source: PubMed Central journal article supplement — Br J Sports Med. 2022 Apr 8;56(15):862–9. doi: 10.1136/bjsports-2021-105115 (PMC9304118; doi:10.1136/bjsports-2021-105115), 2022-04-08
Supplement: bjsports-2021-105115supp002.pdf [file bjsports-2021-105115supp002.pdf]

Appendix table 2. The Knee injury and Osteoarthritis Outcome Score<sub>4</sub> by follow-up.

| Follow-up                | Variable          | Non-surgical treatment (n=982)                          | ACL Reconstruction (n=8838)                              | p-value | Difference between groups Mean (95% CI) |
|--------------------------|-------------------|---------------------------------------------------------|----------------------------------------------------------|---------|-----------------------------------------|
| <b>Baseline</b>          |                   |                                                         |                                                          |         |                                         |
|                          | KOOS <sub>4</sub> | 51.1 (17.3)<br>51 (8.2; 98.2)<br>(49.5; 52.6)<br>n=488  | 54.0 (17.7)<br>53.8 (2.5; 100)<br>(53.6; 54.4)<br>n=5977 | 0.0003  | -2.93 (-4.57; -1.28)                    |
| <b>1 year follow-up</b>  |                   |                                                         |                                                          |         |                                         |
|                          | KOOS <sub>4</sub> | 64.6 (17.8)<br>66.2 (14; 100)<br>(63.3; 65.9)<br>n=740  | 71.7 (18.9)<br>74.6 (0.7; 100)<br>(71.1; 72.3)<br>n=4019 | 0.0001  | -7.06 (-8.52; -5.62)                    |
| <b>2 year follow-up</b>  |                   |                                                         |                                                          |         |                                         |
|                          | KOOS <sub>4</sub> | 68.6 (19.1)<br>70.8 (6.3; 100)<br>(67.1; 70.2)<br>n=613 | 73.7 (19.1)<br>77.2 (5.9; 100)<br>(73.1; 74.3)<br>n=3397 | 0.0001  | -5.06 (-6.67; -3.45)                    |
| <b>5 year follow-up</b>  |                   |                                                         |                                                          |         |                                         |
|                          | KOOS <sub>4</sub> | 72.5 (19.5)<br>76.7 (17; 100)<br>(70.4; 74.6)<br>n=329  | 76.6 (19.2)<br>81.7 (0.7; 100)<br>(75.8; 77.4)<br>n=2203 | 0.0004  | -4.17 (-6.39; -1.94)                    |
| <b>10 year follow-up</b> |                   |                                                         |                                                          |         |                                         |
|                          | KOOS <sub>4</sub> | 68.8 (18.3)<br>71.5 (25.9; 100)<br>(65.1; 72.5)<br>n=96 | 76.9 (20.0)<br>82.9 (0.7; 100)<br>(75.3; 78.5)<br>n=585  | 0.0006  | -8.11 (-12.32; -3.81)                   |

ACL, anterior cruciate ligament; CI, confidence interval; KOOS<sub>4</sub>, aggregated version of the Knee injury and Osteoarthritis Outcome Score.

For continuous variables Mean (SD) / Median (Min; Max) / (95% CI for Mean) / n= is presented.

For comparison between groups the Fisher's Non Parametric Permutation Test was used for continuous variables. The confidence interval for the mean difference between groups is based on Fisher's non-parametric permutation test.
